# Supplementary material for: Standardized Ultrasound Evaluation for Active Surveillance of Low-Risk Thyroid Microcarcinoma in Adults: 2024 Korean Society of Thyroid Radiology Consensus Statement
Source: PubMed Central journal article supplement — J Korean Soc Radiol. 2024 Nov 15;85(6):1060–82. doi: 10.3348/jksr.2024.0132 (PMC11625847; doi:10.3348/jksr.2024.0132), 2024-11-15
Supplement: jksr-85-1060-s001.pdf [file jksr-85-1060-s001.pdf]

## Supplement

**Supplementary Table 1. Scope of guideline**

| <b>Category</b>                    | <b>Content</b>                                                                                                                |
|------------------------------------|-------------------------------------------------------------------------------------------------------------------------------|
| <b>Disease/category</b>            | Papillary thyroid microcarcinoma                                                                                              |
| <b>Guideline category</b>          | Imaging assessment for papillary thyroid microcarcinoma under active surveillance                                             |
| <b>Clinical specialty</b>          | Thyroid specialists (radiologists, endocrinologists, surgeons, other thyroid specialists)                                     |
| <b>Guideline objective(s)</b>      | To evaluate the appropriate use of imaging methods when considering active surveillance for papillary thyroid microcarcinomas |
| <b>Target population</b>           | Patients with papillary thyroid microcarcinoma                                                                                |
| <b>Diagnosis and interventions</b> | US including Doppler US<br>Computed tomography<br>US-guided fine needle aspiration of core needle biopsy                      |
| <b>Major outcomes considered</b>   | Cancer-related mortality, recurrence rate, progression rate                                                                   |

US = ultrasound
