# Supplementary material for: Standardized Ultrasound Evaluation for Active Surveillance of Low-Risk Thyroid Microcarcinoma in Adults: 2024 Korean Society of Thyroid Radiology Consensus Statement
Source: PubMed Central journal article supplement — J Korean Soc Radiol. 2024 Nov 15;85(6):1060–82. doi: 10.3348/jksr.2024.0132 (PMC11625847; doi:10.3348/jksr.2024.0132), 2024-11-15
Supplement: jksr-85-1060-s002.pdf [file jksr-85-1060-s002.pdf]

### Supplementary Table 2. Methodology

| <b>Category</b>                                  | <b>Content</b>                                                                                                                                                                                      |
|--------------------------------------------------|-----------------------------------------------------------------------------------------------------------------------------------------------------------------------------------------------------|
| <b>Methods used to collect/select evidence</b>   | Searches of electronic databases, including Ovid-MEDLINE                                                                                                                                            |
| <b>Literature search procedure</b>               | MEDLINE literature search was based on keywords provided by the first author and validated by the guideline development committee of KSThR                                                          |
| <b>Methods used to formulate recommendations</b> | Expert consensus and modified Delphi methodology                                                                                                                                                    |
| <b>Cost analysis</b>                             | Cost of active surveillance including serial US, CT, and surgery varies by country. Cost considerations can influence management decisions based on specific conditions and current evidence        |
| <b>Method of guideline validation</b>            | Internal peer review was performed by members of KSThR after making the draft available for 1 month at website of KSThR ( <a href="http://www.thyroidimaging.kr">http://www.thyroidimaging.kr</a> ) |

US = ultrasound, CT = computed tomography, KSThR = Korean Society of Thyroid Radiology
