# Supplementary material for: Standardized Ultrasound Evaluation for Active Surveillance of Low-Risk Thyroid Microcarcinoma in Adults: 2024 Korean Society of Thyroid Radiology Consensus Statement
Source: PubMed Central journal article supplement — J Korean Soc Radiol. 2024 Nov 15;85(6):1060–82. doi: 10.3348/jksr.2024.0132 (PMC11625847; doi:10.3348/jksr.2024.0132), 2024-11-15
Supplement: jksr-85-1060-s003.pdf [file jksr-85-1060-s003.pdf]

**Supplementary Table 3. Identifying information and availability**

| <b>Category</b>                                    | <b>Content</b>                                                                                                                                                                                                                                                                                                                                                                                               |
|----------------------------------------------------|--------------------------------------------------------------------------------------------------------------------------------------------------------------------------------------------------------------------------------------------------------------------------------------------------------------------------------------------------------------------------------------------------------------|
| <b>Data released</b>                               | 2024                                                                                                                                                                                                                                                                                                                                                                                                         |
| <b>Guideline developers</b>                        | Korean Society of Radiology (KSR),<br>Korean Society of Thyroid Radiology (KSThR)                                                                                                                                                                                                                                                                                                                            |
| <b>Source of funding</b>                           | This study was supported by a grant from the 2024 Clinical Practice Guideline Research Fund by the Korean Society of Radiology & Korean Society of Thyroid Radiology, and by a grant from the Korea Health Technology R&D Project through the Patient-Doctor Shared Decision Marking Research Center (PDSDM), funded by the Ministry of Health & Welfare, Republic of Korea (grant number: RS-2023-KH142322) |
| <b>Guideline committee</b>                         | Guideline committee of KSThR<br>Ji Ye Lee, Min Kyoung Lee, Hyun Kyung Lim, Chang Yoon Lee, Jin Yong Sung, Jung Hyun Yoon, Soo Yeon Han, Jung Hee Shin, Ji-hoon Kim, So Lyung Jung, Sae Rom Chung, Jung Hwan Baek, Dong Gyu Na<br>Advisory committee<br>Eun Kyoung Lee, Young Joo Park                                                                                                                        |
| <b>Financial disclosures/conflicts of interest</b> | Dr. Jung Hwan Baek has been a consultant for two radiofrequency companies, STARmed and RF medical, since 2017. Dr. Soo Yeon Hahn and Dr. Jung Hwan Baek, the editorial board member of the Korean Journal of Radiology, was not involved in the editorial evaluation or decision to publish this article                                                                                                     |
| <b>Guideline status</b>                            | This is the current release of the guideline                                                                                                                                                                                                                                                                                                                                                                 |
| <b>Guideline availability</b>                      | Electronic copies: Available from the official website of KSThR<br>( <a href="http://thyroidimaging.kr">http://thyroidimaging.kr</a> )                                                                                                                                                                                                                                                                       |

KSR = Korean Society of Radiology, KSThR = Korean Society of Thyroid Radiology
